# Supplementary material
Source: PubMed Central journal article supplement (PMC2047011)
Supplement: bjpg57-371TableS1.pdf [file bjpg57-371TableS1.pdf]

**Supplementary Table 1. First consultations for rectal bleeding and postmenopausal bleeding by age and sex.**

| Age group (years)                       | Number of person-years observation | Number of first consultations | Rate per 1000 patients per year |
|-----------------------------------------|------------------------------------|-------------------------------|---------------------------------|
| <b>Rectal bleeding: females</b>         |                                    |                               |                                 |
| 25–29                                   | 376 835                            | 1 085                         | 2.9                             |
| 30–34                                   | 475 737                            | 1 228                         | 2.6                             |
| 35–39                                   | 509 649                            | 1 324                         | 2.6                             |
| 40–44                                   | 473 068                            | 1 230                         | 2.6                             |
| 45–49                                   | 411 254                            | 1 165                         | 2.8                             |
| 50–54                                   | 402 185                            | 1 204                         | 3.0                             |
| 55–59                                   | 424 309                            | 1 503                         | 3.5                             |
| 60–64                                   | 325 830                            | 1 216                         | 3.7                             |
| 65–69                                   | 299 470                            | 1 205                         | 4.0                             |
| 70–74                                   | 280 363                            | 1 130                         | 4.0                             |
| 75–79                                   | 262 158                            | 1 048                         | 4.0                             |
| 80–84                                   | 238 694                            | 1 025                         | 4.3                             |
| 85 and over                             | 287 580                            | 1 380                         | 4.8                             |
| All females                             | 4 767 132                          | 15 743                        | 3.3                             |
| <b>Rectal bleeding: males</b>           |                                    |                               |                                 |
| 25–29                                   | 365 035                            | 824                           | 2.3                             |
| 30–34                                   | 480 944                            | 1 166                         | 2.4                             |
| 35–39                                   | 531 930                            | 1 366                         | 2.6                             |
| 40–44                                   | 505 340                            | 1 401                         | 2.8                             |
| 45–49                                   | 435 477                            | 1 293                         | 3.0                             |
| 50–54                                   | 417 257                            | 1 266                         | 3.0                             |
| 55–59                                   | 440 109                            | 1 390                         | 3.2                             |
| 60–64                                   | 333 470                            | 1 158                         | 3.5                             |
| 65–69                                   | 297 625                            | 1 150                         | 3.9                             |
| 70–74                                   | 257 930                            | 1 098                         | 4.3                             |
| 75–79                                   | 213 099                            | 918                           | 4.3                             |
| 80–84                                   | 164 077                            | 754                           | 4.6                             |
| 85 and over                             | 132 211                            | 648                           | 4.9                             |
| All males                               | 4 574 504                          | 14 432                        | 3.2                             |
| <b>Postmenopausal bleeding: females</b> |                                    |                               |                                 |
| 40–44                                   | 473 068                            | 36                            | 0.1                             |
| 45–49                                   | 411 254                            | 193                           | 0.5                             |
| 50–54                                   | 402 185                            | 1 239                         | 3.1                             |
| 55–59                                   | 424 309                            | 3 133                         | 7.4                             |
| 60–64                                   | 325 830                            | 1 917                         | 5.9                             |
| 65–69                                   | 299 470                            | 1 265                         | 4.2                             |
| 70–74                                   | 280 363                            | 860                           | 3.1                             |
| 75–79                                   | 262 158                            | 582                           | 2.2                             |
| 80–84                                   | 238 694                            | 487                           | 2.0                             |
| 85 and over                             | 287 580                            | 430                           | 1.5                             |
| All females                             | 3 404 911                          | 10 142                        | 3.0                             |
