# Supplementary material
Source: PubMed Central journal article supplement (PMC2047011)
Supplement: bjpg57-371TableS2.pdf [file bjpg57-371TableS2.pdf]

Supplementary Table 2. Characteristics of patients

| Characteristic                        | Patients with<br>rectal bleeding<br>N = 29 007 |      | Patients with<br>postmenopausal bleeding<br>N = 10 122 |       |
|---------------------------------------|------------------------------------------------|------|--------------------------------------------------------|-------|
|                                       | n                                              | %    | n                                                      | %     |
| <b>Sex</b>                            |                                                |      |                                                        |       |
| Female                                | 15 076                                         | 52.0 | 10 122                                                 | 100.0 |
| Male                                  | 13 931                                         | 48.0 | –                                                      | –     |
| <b>Age group (years)</b>              |                                                |      |                                                        |       |
| 25–34                                 | 4 717                                          | 16.3 | –                                                      | –     |
| 35–44 <sup>a</sup>                    | 5 301                                          | 18.3 | 77                                                     | 0.8   |
| 45–54                                 | 5 120                                          | 17.7 | 2 896                                                  | 28.6  |
| 55–64                                 | 4 927                                          | 17.0 | 4 278                                                  | 42.3  |
| 65–74                                 | 4 383                                          | 15.1 | 1 718                                                  | 17.0  |
| 75–84                                 | 3 168                                          | 10.9 | 856                                                    | 8.5   |
| 85 and over                           | 1 391                                          | 4.8  | 297                                                    | 2.9   |
| <b>Area deprivation level</b>         |                                                |      |                                                        |       |
| Townsend quintile 1 (least deprived)  | 6 535                                          | 22.5 | 2 652                                                  | 26.2  |
| Townsend quintile 2                   | 6 013                                          | 20.7 | 2 267                                                  | 22.4  |
| Townsend quintile 3                   | 5 124                                          | 17.7 | 1 819                                                  | 18.0  |
| Townsend quintile 4                   | 4 787                                          | 16.5 | 1 474                                                  | 14.6  |
| Townsend quintile 5 (most deprived)   | 5 244                                          | 18.1 | 1 444                                                  | 14.3  |
| Score missing                         | 1 304                                          | 4.5  | 466                                                    | 4.6   |
| <b>Body mass index (BMI)</b>          |                                                |      |                                                        |       |
| Normal (<25)                          | 9 485                                          | 32.7 | 3 421                                                  | 33.8  |
| Overweight (25–29.9)                  | 7 995                                          | 27.6 | 2 706                                                  | 26.7  |
| Obese (≥30)                           | 4 196                                          | 14.5 | 2 006                                                  | 19.8  |
| No valid BMI recorded                 | 7 331                                          | 25.3 | 1 989                                                  | 19.7  |
| <b>Blood pressure (BP)</b>            |                                                |      |                                                        |       |
| Normal                                | 22 100                                         | 76.2 | 7 938                                                  | 78.4  |
| High <sup>b</sup>                     | 3 210                                          | 11.1 | 1 346                                                  | 13.3  |
| No valid BP recorded                  | 3 697                                          | 12.7 | 838                                                    | 8.3   |
| <b>Smoking status</b>                 |                                                |      |                                                        |       |
| Non-smoker                            | 18 459                                         | 63.6 | 7 276                                                  | 71.9  |
| Smoker                                | 5 435                                          | 18.7 | 1 445                                                  | 14.3  |
| Not recorded                          | 5 113                                          | 17.6 | 1 401                                                  | 13.8  |
| <b>Comorbid physical conditions</b>   |                                                |      |                                                        |       |
| Coronary heart disease                | 2 641                                          | 9.1  | 660                                                    | 6.5   |
| Stroke                                | 1 170                                          | 4.0  | 268                                                    | 2.7   |
| Diabetes                              | 1 110                                          | 3.8  | 468                                                    | 4.6   |
| Chronic obstructive airways disease   | 950                                            | 3.3  | 260                                                    | 2.6   |
| Asthma                                | 3 145                                          | 10.8 | 1 056                                                  | 10.4  |
| Cancer                                | 1 054                                          | 3.6  | 514                                                    | 5.1   |
| <b>Serious mental health problems</b> |                                                |      |                                                        |       |
| Schizophrenia                         | 126                                            | 0.4  | 59                                                     | 0.6   |
| Bipolar disorder                      | 72                                             | 0.2  | 36                                                     | 0.4   |
| Learning difficulties                 | 189                                            | 0.7  | 38                                                     | 0.4   |
| Long-standing depression              | 257                                            | 0.9  | 113                                                    | 1.1   |
| Any of these mental health problems   | 606                                            | 2.1  | 229                                                    | 2.3   |
| <b>Medication</b>                     |                                                |      |                                                        |       |
| Used HRT in last 12 months            | –                                              | –    | 3 017                                                  | 29.8  |
| Used tamoxifen in last 12 months      | –                                              | –    | 413                                                    | 4.1   |

<sup>a</sup>Minimum age 40 years for postmenopausal bleeding. <sup>b</sup>High blood pressure = systolic >160 mmHg and/or diastolic >90 mmHg. HRT = hormone replacement therapy.
