# Supplementary material
Source: PubMed Central journal article supplement (PMC2047011)
Supplement: bjpg57-371TableS3.pdf [file bjpg57-371TableS3.pdf]

**Supplementary Table 3. Recorded events in the 2 years following first consultation for bleeding**

| Event/age group (years)          | Patients with rectal bleeding<br>N = 29 007 |      | Patients with postmenopausal bleeding<br>N = 10 122 |      |
|----------------------------------|---------------------------------------------|------|-----------------------------------------------------|------|
|                                  | n                                           | %    | n                                                   | %    |
| Relevant referral/investigation: |                                             |      |                                                     |      |
| all ages                         | 6065                                        | 20.9 | 4055                                                | 40.1 |
| 25–34                            | 730                                         | 15.5 | –                                                   | –    |
| 35–44 <sup>a</sup>               | 1103                                        | 20.8 | 27                                                  | 35.1 |
| 45–54                            | 1137                                        | 22.2 | 1160                                                | 40.1 |
| 55–64                            | 1150                                        | 23.3 | 1777                                                | 41.5 |
| 65–74                            | 1057                                        | 24.1 | 714                                                 | 41.6 |
| 75–84                            | 677                                         | 21.4 | 300                                                 | 35.0 |
| ≥85                              | 211                                         | 15.2 | 77                                                  | 25.9 |
| Relevant cancer: all ages        | 645                                         | 2.2  | 170                                                 | 1.7  |
| 25–34                            | 3                                           | 0.1  | –                                                   | –    |
| 35–44 <sup>a</sup>               | 17                                          | 0.3  | 0                                                   | 0.0  |
| 45–54                            | 75                                          | 1.5  | 10                                                  | 0.3  |
| 55–64                            | 137                                         | 2.8  | 49                                                  | 1.1  |
| 65–74                            | 189                                         | 4.3  | 54                                                  | 3.1  |
| 75–84                            | 173                                         | 5.5  | 46                                                  | 5.4  |
| ≥85                              | 51                                          | 3.7  | 11                                                  | 3.7  |
| Relevant surgery: all ages       | 252                                         | 0.9  | 375                                                 | 3.7  |
| 25–34                            | 16                                          | 0.3  | –                                                   | –    |
| 35–44 <sup>a</sup>               | 8                                           | 0.2  | 3                                                   | 3.9  |
| 45–54                            | 36                                          | 0.7  | 46                                                  | 1.6  |
| 55–64                            | 50                                          | 1.0  | 150                                                 | 3.5  |
| 65–74                            | 67                                          | 1.5  | 111                                                 | 6.5  |
| 75–84                            | 63                                          | 2.0  | 56                                                  | 6.5  |
| ≥85                              | 12                                          | 0.9  | 9                                                   | 3.0  |

<sup>a</sup>Minimum age 40 years for postmenopausal bleeding.
