# Supplementary material
Source: PubMed Central journal article supplement (PMC2047011)
Supplement: bjpg57-371TableS4.pdf [file bjpg57-371TableS4.pdf]

**Supplementary Table 4. Characteristics and events for patients with and without mental health problems.**

| Characteristic/event                 | Rectal bleeding                   |                                         | Postmenopausal bleeding           |                                       |
|--------------------------------------|-----------------------------------|-----------------------------------------|-----------------------------------|---------------------------------------|
|                                      | Mental health problems<br>N = 606 | No mental health problems<br>N = 28 401 | Mental health problems<br>N = 229 | No mental health problem<br>N = 9 893 |
|                                      | n (%)                             | n (%)                                   | n (%)                             | n (%)                                 |
| <b>Sex</b>                           |                                   |                                         |                                   |                                       |
| Female                               | 340 (56.1)                        | 14 736 (51.9)                           | 229 (100.0)                       | 9 893 (100.0)                         |
| Male                                 | 266 (43.9)                        | 13 665 (48.1)                           | –                                 | –                                     |
| <b>Age group (years)</b>             |                                   |                                         |                                   |                                       |
| 25–34                                | 74 (12.2)                         | 4 643 (16.3)                            | –                                 | –                                     |
| 35–44 <sup>a</sup>                   | 119 (19.6)                        | 5 182 (18.2)                            | 2 (0.9)                           | 75 (0.8)                              |
| 45–54                                | 108 (17.8)                        | 5 012 (17.6)                            | 76 (33.2)                         | 2 820 (28.5)                          |
| 55–64                                | 118 (19.5)                        | 4 809 (16.9)                            | 92 (40.2)                         | 4 186 (42.3)                          |
| 65–74                                | 96 (15.8)                         | 4 287 (15.1)                            | 33 (14.4)                         | 1 685 (17.0)                          |
| 75–84                                | 63 (10.4)                         | 3 105 (10.9)                            | 15 (6.6)                          | 841 (8.5)                             |
| 85 and over                          | 28 (4.6)                          | 1 363 (4.8)                             | 11 (4.8)                          | 286 (2.9)                             |
| <b>Area deprivation level</b>        |                                   |                                         |                                   |                                       |
| Townsend quintile 1                  | 97 (16.0)                         | 6 438 (22.7)                            | 41 (17.9)                         | 2 611 (26.4)                          |
| Townsend quintile 2                  | 110 (18.2)                        | 5 903 (20.8)                            | 43 (18.8)                         | 2 224 (22.5)                          |
| Townsend quintile 3                  | 122 (20.1)                        | 5 002 (17.6)                            | 38 (16.6)                         | 1 781 (18.0)                          |
| Townsend quintile 4                  | 106 (17.5)                        | 4 681 (16.5)                            | 43 (18.8)                         | 1 431 (14.5)                          |
| Townsend quintile 5                  | 152 (25.1)                        | 5 092 (17.9)                            | 56 (24.5)                         | 1 388 (14.0)                          |
| Score missing                        | 19 (3.1)                          | 1 285 (4.5)                             | 8 (3.5)                           | 458 (4.6)                             |
| <b>Body mass index (BMI)</b>         |                                   |                                         |                                   |                                       |
| Normal (<25)                         | 170 (28.1)                        | 9 315 (32.8)                            | 48 (21.0)                         | 3 373 (34.1)                          |
| Overweight (25–29.9)                 | 175 (28.9)                        | 7 820 (27.5)                            | 55 (24.0)                         | 2 651 (26.8)                          |
| Obese (≥30)                          | 110 (18.2)                        | 4 086 (14.4)                            | 70 (30.6)                         | 1 936 (19.6)                          |
| No valid BMI recorded                | 151 (24.9)                        | 7 180 (25.3)                            | 56 (24.5)                         | 1 933 (19.5)                          |
| <b>Blood pressure (BP)</b>           |                                   |                                         |                                   |                                       |
| Normal                               | 478 (78.9)                        | 21 622 (76.1)                           | 178 (77.7)                        | 7 760 (78.4)                          |
| High <sup>b</sup>                    | 66 (10.9)                         | 3 144 (11.1)                            | 35 (15.3)                         | 1 311 (13.3)                          |
| No valid BP recorded                 | 62 (10.2)                         | 3 635 (12.8)                            | 16 (7.0)                          | 822 (8.3)                             |
| <b>Smoking status</b>                |                                   |                                         |                                   |                                       |
| Non-smoker                           | 349 (57.6)                        | 18 110 (63.8)                           | 144 (62.9)                        | 7 132 (72.1)                          |
| Smoker                               | 173 (28.5)                        | 5 262 (18.5)                            | 51 (22.3)                         | 1 394 (14.1)                          |
| Not recorded                         | 84 (13.9)                         | 5 029 (17.7)                            | 34 (14.9)                         | 1 367 (13.8)                          |
| <b>Comorbid physical conditions</b>  |                                   |                                         |                                   |                                       |
| Coronary heart disease               | 66 (10.9)                         | 2 575 (9.1)                             | 13 (5.7)                          | 647 (6.5)                             |
| Stroke                               | 33 (5.4)                          | 1 137 (4.0)                             | 9 (3.9)                           | 259 (2.6)                             |
| Diabetes                             | 34 (5.6)                          | 1 076 (3.8)                             | 26 (11.4)                         | 442 (4.5)                             |
| Chronic obstructive airways disease  | 32 (5.3)                          | 918 (3.2)                               | 5 (2.2)                           | 255 (2.6)                             |
| Asthma                               | 83 (13.7)                         | 3 062 (10.8)                            | 27 (11.8)                         | 1 029 (10.4)                          |
| Cancer                               | 17 (2.8)                          | 1 037 (3.7)                             | 12 (5.2)                          | 502 (5.1)                             |
| <b>Medication</b>                    |                                   |                                         |                                   |                                       |
| Used HRT in last 12 months           | –                                 | –                                       | 71 (31.0)                         | 2 946 (29.8)                          |
| Used tamoxifen in last 12 months     | –                                 | –                                       | 9 (3.9)                           | 404 (4.1)                             |
| <b>Events in following two years</b> |                                   |                                         |                                   |                                       |
| Relevant referral/investigation      | 137 (22.6)                        | 5 928 (20.9)                            | 102 (44.5)                        | 3 953 (40.0)                          |
| Relevant cancer                      | 9 (1.5)                           | 636 (2.2)                               | 3 (1.3)                           | 167 (1.7)                             |
| Relevant surgery                     | 2 (0.3)                           | 250 (0.9)                               | 6 (2.6)                           | 369 (3.7)                             |

<sup>a</sup>Minimum age 40 years for postmenopausal bleeding. <sup>b</sup>High blood pressure = systolic >160 mmHg and/or diastolic >90 mmHg. HRT = hormone replacement therapy.
