# Supplementary material
Source: PubMed Central journal article supplement (PMC2047011)
Supplement: bjpg57-371TableS5.pdf [file bjpg57-371TableS5.pdf]

**Supplementary Table 5. Risk of relevant cancer within 2 years of first consultation for bleeding.**

| Characteristic                      | Rectal bleeding           |             | Postmenopausal bleeding   |             |
|-------------------------------------|---------------------------|-------------|---------------------------|-------------|
|                                     | Hazard ratio <sup>a</sup> | 95% CI      | Hazard ratio <sup>a</sup> | 95% CI      |
| <b>Sex</b>                          |                           |             |                           |             |
| Female                              | 1.00                      | –           | –                         | –           |
| Male                                | 1.72                      | 1.46, 2.01  | –                         | –           |
| <b>Age group (years)</b>            |                           |             |                           |             |
| 54 or less <sup>b</sup>             | 1.00                      | –           | 1.00                      | –           |
| 55–64                               | 4.54                      | 3.48, 5.92  | 3.80                      | 1.92, 7.52  |
| 65–74                               | 7.14                      | 5.52, 9.22  | 8.91                      | 4.51, 17.63 |
| 75 and over                         | 9.14                      | 7.05, 11.85 | 12.98                     | 6.47, 26.04 |
| <b>Area deprivation level</b>       |                           |             |                           |             |
| Townsend quintile 1                 | 1.00                      | –           | 1.00                      | –           |
| Townsend quintile 2                 | 1.11                      | 0.88, 1.40  | 1.35                      | 0.86, 2.11  |
| Townsend quintile 3                 | 1.11                      | 0.87, 1.41  | 1.04                      | 0.63, 1.70  |
| Townsend quintile 4                 | 1.14                      | 0.89, 1.46  | 1.27                      | 0.79, 2.06  |
| Townsend quintile 5                 | 0.91                      | 0.69, 1.18  | 1.02                      | 0.61, 1.72  |
| Score missing                       | 1.08                      | 0.71, 1.64  | 0.68                      | 0.26, 1.73  |
| <b>Body mass index (BMI)</b>        |                           |             |                           |             |
| Normal (<25)                        | 1.00                      | –           | 1.00                      | –           |
| Overweight (25–29.9)                | 1.04                      | 0.85, 1.28  | 1.39                      | 0.89, 2.17  |
| Obese (≥30)                         | 1.13                      | 0.88, 1.44  | 2.00                      | 1.26, 3.10  |
| No valid BMI recorded               | 1.00                      | 0.77, 1.31  | 1.58                      | 0.92, 2.73  |
| <b>Blood pressure (BP)</b>          |                           |             |                           |             |
| Normal                              | 1.00                      | –           | 1.00                      | –           |
| High <sup>c</sup>                   | 1.08                      | 0.88, 1.34  | 0.91                      | 0.61, 1.37  |
| No valid BP recorded                | 1.25                      | 0.92, 1.71  | 0.76                      | 0.41, 1.43  |
| <b>Smoking status</b>               |                           |             |                           |             |
| Non-smoker                          | 1.00                      | –           | 1.00                      | –           |
| Smoker                              | 0.72                      | 0.56, 0.93  | 1.13                      | 0.68, 1.88  |
| Not recorded                        | 0.86                      | 0.65, 1.15  | 1.10                      | 0.64, 1.90  |
| <b>Comorbid physical conditions</b> |                           |             |                           |             |
| Coronary heart disease              | 0.79                      | 0.63, 0.99  | 0.95                      | 0.59, 1.52  |
| Stroke                              | 0.96                      | 0.71, 1.29  | 0.78                      | 0.36, 1.68  |
| Diabetes                            | 1.02                      | 0.73, 1.41  | 1.10                      | 0.63, 1.94  |
| Chronic obstructive airways disease | 1.09                      | 0.77, 1.54  | 0.67                      | 0.24, 1.86  |
| Asthma                              | 0.96                      | 0.73, 1.25  | 0.66                      | 0.36, 1.24  |
| Cancer                              | 1.05                      | 0.77, 1.45  | 1.58                      | 0.97, 2.59  |
| <b>HRT medication</b>               |                           |             |                           |             |
| Previous user/none recorded         | –                         | –           | 1.00                      | –           |
| Used in last 12 months              | –                         | –           | 0.31                      | 0.18, 0.55  |

<sup>a</sup>Adjusted for all other variables in table. <sup>b</sup>Minimum age 25 years for rectal bleeding, 40 years for menopausal bleeding. <sup>c</sup>High blood pressure = systolic >160 mmHg and/or diastolic >90 mmHg. HRT = hormone replacement therapy.
